# Supplementary material for: Evaluation of the Therapeutic Potential of Anti-TLR4-Antibody MTS510 in Experimental Stroke and Significance of Different Routes of Application
Source: PLOS journal article supplement (doi:10.1371/journal.pone.0148428), 2016-02-05
Supplement: S5 (10.1371/journal.pone.0148428.s005) [file journal.pone.0148428.s005]

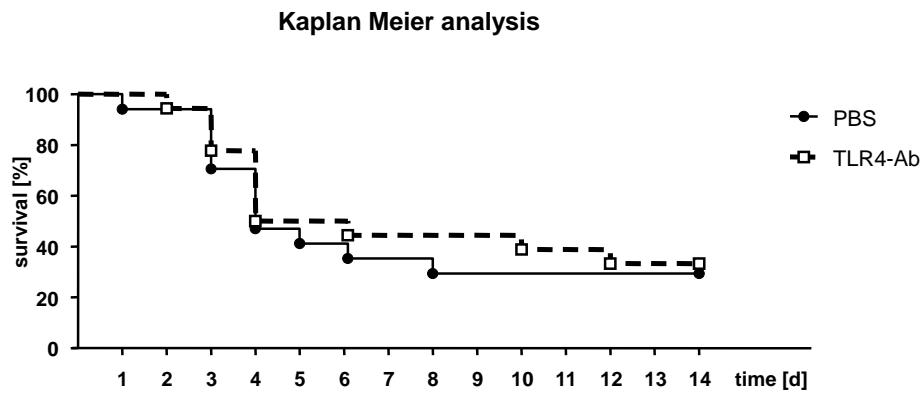

**S5 Figure. Kaplan-Meier analysis of animal survival of wild-type mice after 15min MCAO treated with or without anti-TLR4 antibody *i.a.*.** The percentage of surviving C57Bl/6N wild-type mice after 15min MCAO with (**TLR4-Ab**) or without (**PBS**) *i.a.* application of anti-TLR4/MD2 mAb from postoperative day 1 up to day 14 after start of reperfusion is shown ( $n_{PBS} = 17$ ;  $n_{TLR4} = 18$ ).
